# Supplementary material
Source: HighWire-hosted journal article supplement (https://cmaj.ca/highwire/filestream/58722/field_highwire_adjunct_files/0/what-wong-1-at.pdf)
Supplement: what-wong-1-at.pdf [file what-wong-1-at.pdf]

**Appendix 1 (as supplied by authors): The 2009 ESC Guidelines Recommendations for Surgery in IE.**

| Indications for surgery                                                                                                                                                                                         | Timing <sup>1</sup> | Class of recommendation | Level of evidence |
|-----------------------------------------------------------------------------------------------------------------------------------------------------------------------------------------------------------------|---------------------|-------------------------|-------------------|
| <i>(A) Heart failure</i>                                                                                                                                                                                        |                     |                         |                   |
| Aortic or mitral IE with severe acute regurgitation or valve obstruction causing refractory pulmonary edema or cardiogenic shock                                                                                | Emergency           | I                       | B                 |
| Aortic or mitral IE with fistula into a cardiac chamber or pericardium causing refractory pulmonary edema or shock                                                                                              | Emergency           | I                       | B                 |
| Aortic or mitral IE with severe acute regurgitation or valve obstruction and persisting heart failure or echocardiographic signs of poor hemodynamic tolerance (early mitral closure or pulmonary hypertension) | Urgent              | I                       | B                 |
| Aortic or mitral IE with severe regurgitation and no heart failure                                                                                                                                              | Elective            | IIa                     | B                 |
| <i>(B) Uncontrolled infection</i>                                                                                                                                                                               |                     |                         |                   |
| Locally uncontrolled infection (abscess, false aneurysm, fistula, enlarging vegetation)                                                                                                                         | Urgent              | I                       | B                 |
| Persisting fever and positive blood cultures >7-10 days                                                                                                                                                         | Urgent              | I                       | B                 |
| Infection caused by fungi or multiresistant organisms                                                                                                                                                           | Urgent/elective     | I                       | B                 |
| <i>(C) Prevention of embolism</i>                                                                                                                                                                               |                     |                         |                   |
| Aortic or mitral IE with large vegetations (>10mm) following one or more embolic episodes despite appropriate antibiotic therapy                                                                                | Urgent              | I                       | B                 |
| Aortic or mitral IE with large vegetations (>10mm) and other predictors of complicated course (heart failure, persistent infection, abscess)                                                                    | Urgent              | I                       | C                 |
| Isolated very large vegetations (>15mm)                                                                                                                                                                         | Urgent              | IIb                     | C                 |

<sup>1</sup>Emergency surgery: within 24h; urgent surgery: within a few days; elective surgery: after at least 1 to 2 weeks of antibiotic therapy

Reproduced with permission from the European Heart Journal (Habib G, Hoen B, Tornos P, et al. Guidelines on the prevention, diagnosis, and treatment of infective endocarditis (new version 2009): the Task Force on the Prevention, Diagnosis, and Treatment of Infective Endocarditis of the European Society of Cardiology (ESC). Endorsed by the European Society of Clinical Microbiology and Infectious Diseases (ESCMID) and the International Society of Chemotherapy (ISC) for Infection and Cancer. *Eur Heart J* 2009;30:2369-413.)
